# Supplementary material for: The Key Role of Tin (Sn) in Microstructure and Mechanical Properties of Ti2SnC (M2AX) Thin Nanocrystalline Films and Powdered Polycrystalline Samples
Source: MDPI journal article supplement (doi:10.3390/nano12030307), 2022-01-18
Supplement: s1 [file s1]

## Supplementary Material

# The Key Role of Tin (Sn) in Microstructure and Mechanical Properties of Ti<sub>2</sub>SnC (M<sub>2</sub>AX) Thin Nanocrystalline Films and Powdered Polycrystalline Samples

Snejana Bakardjieva <sup>1,2,\*</sup>, Jiří Plocek <sup>1</sup>, Bauyrzhan Ismagulov <sup>1,3</sup>, Jaroslav Kupčík <sup>1</sup>, Jiří Vacík <sup>4</sup>, Giovanni Ceccio <sup>4</sup>, Vasily Lavrentiev <sup>4</sup>, Jiří Němeček <sup>5</sup>, Štefan Michna <sup>2</sup> and Robert Klie <sup>6</sup>

<sup>1</sup> Institute of Inorganic Chemistry of the Czech Academy of Sciences, 250 68 Husinec-Rez, Czech Republic; plocek@iic.cas.cz (J.P.); ismagulov@iic.cas.cz (B.I.); kupcik@iic.cas.cz (J.K.)

<sup>2</sup> Faculty of Mechanical Engineering, JE Purkyně University, Pasteurova 1, 400 96 Ústí nad Labem, Czech Republic; stefan.michna@ujep.cz

<sup>3</sup> Department of Inorganic Chemistry, Faculty of Science, Charles University in Prague, Albertov 6, 128 43 Praha, Czech Republic

<sup>4</sup> Nuclear Physics Institute of the Czech Academy of Sciences, 250 68 Husinec-Rez, Czech Republic; vacik@ujf.cas.cz (J.V.); ceccio@ujf.cas.cz (G.C.); lavrentiev@ujf.cas.cz (V.L.)

<sup>5</sup> Faculty of Civil Engineering, Czech Technical University in Prague, Thakurova 7, 166 29 Prague, Czech Republic; jiri.nemeczek@fsv.cvut.cz

<sup>6</sup> Department of Physics, The University of Illinois at Chicago, Chicago, IL 60607, USA; rfklie@uic.edu

\* Correspondence: snejana@iic.cas.cz

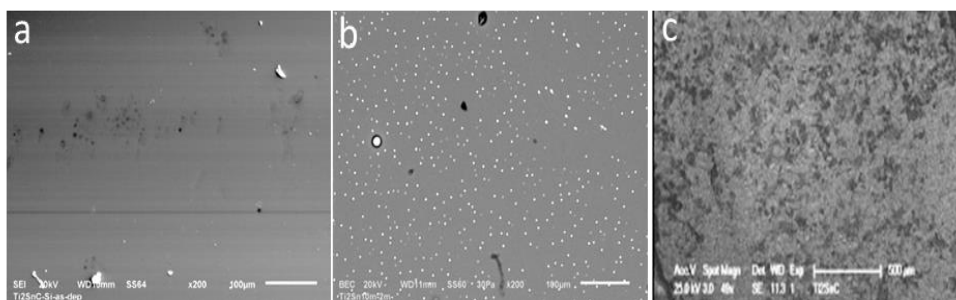

**Figure S1.** Morphology of  $\text{Ti}_2\text{SnC}$   $\text{M}_2\text{AX}$  samples (a)  $\text{Ti}_2\text{SnC\_AGTNCF}$ , (b)  $\text{Ti}_2\text{SnC\_Ar}^+\text{TNCF}$  and (c)  $\text{Ti}_2\text{SnC\_PPS}$  obtained by SEM with SE detector.

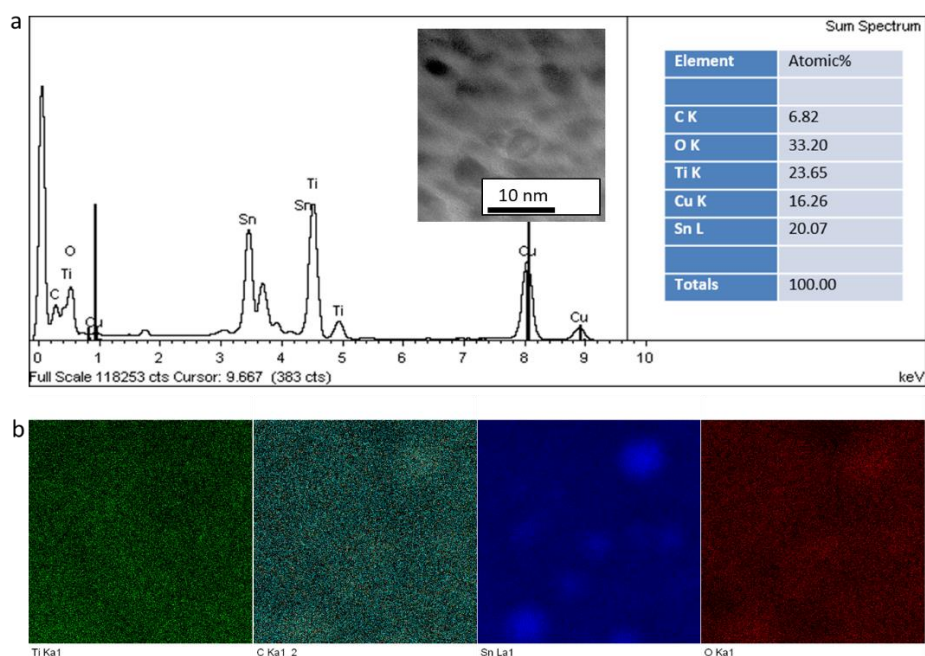

**Figure S2.** (a) EDS-STEM analysis and (b) EDS-STEM mapping  $\text{Ti}_2\text{SnC\_AGTNCF}$ . HAADF-STEM image of  $\text{Ti}_2\text{SnC\_AGTNCF}$  at low magnification and Table with at. % of elements are present as an inset in Figure S2a.

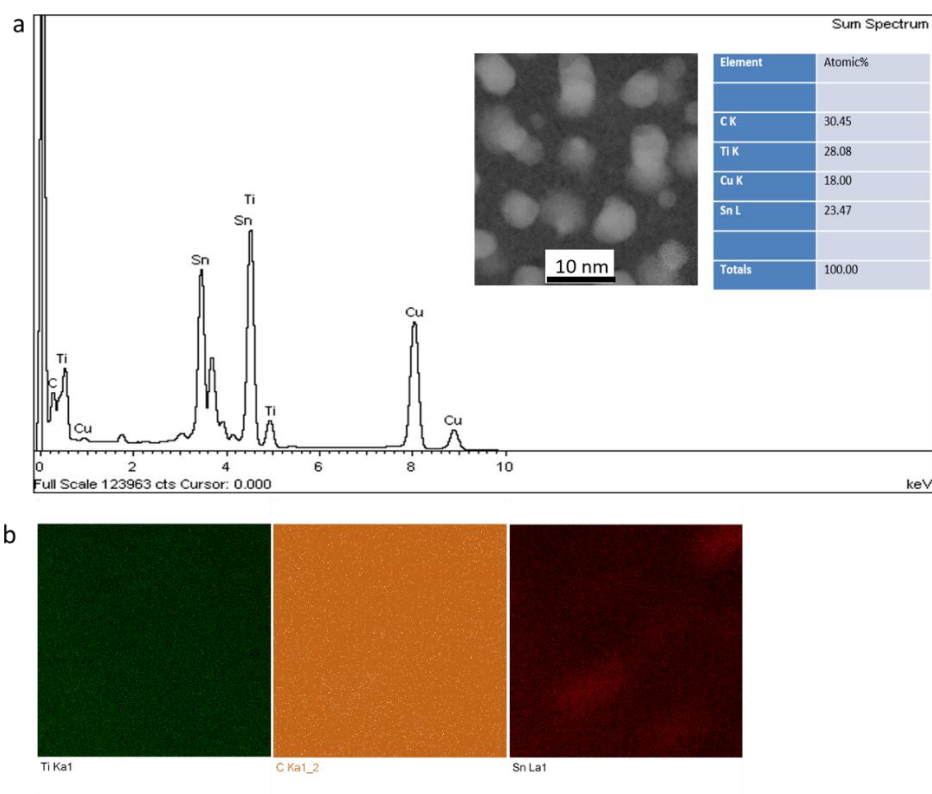

**Figure S3.** (a) EDS-STEM analysis and (b) EDS-STEM mapping  $\text{Ti}_2\text{SnC\_Ar}^+\text{TNCF}$ . HAADF-STEM image of  $\text{Ti}_2\text{SnC\_Ar}^+\text{TNCF}$  at low magnification and Table with at. % of elements are present as an inset in Figure S3a.

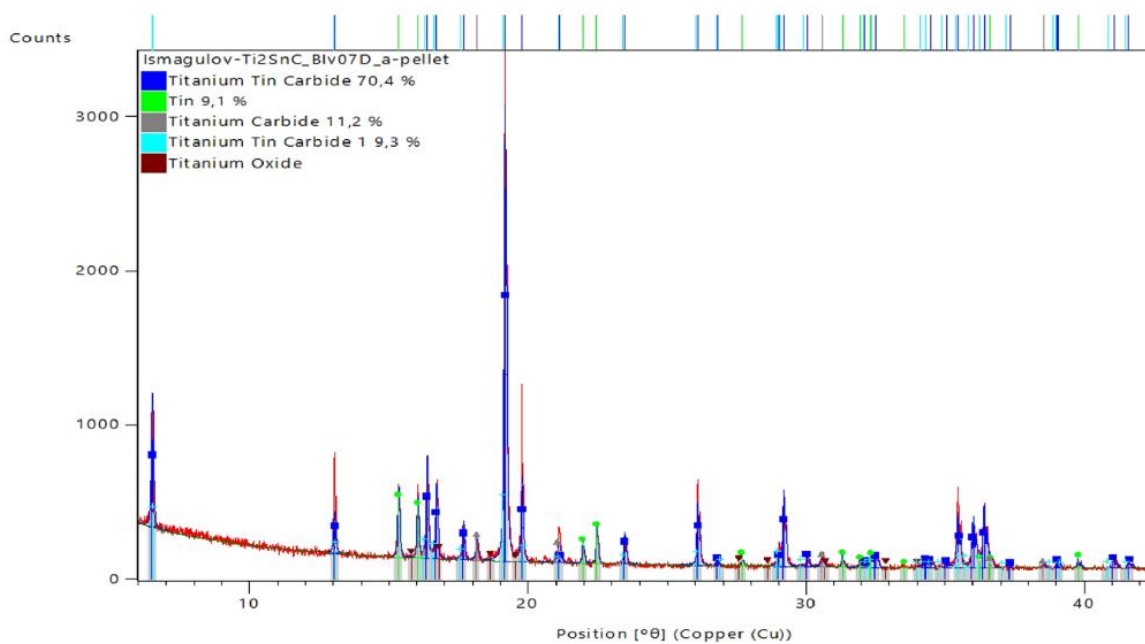

**Figure S4.** XRD pattern of  $\text{Ti}_2\text{SnC}$  PPS: Titanium Tin Carbide  $\text{Ti}_2\text{SnC}$  – 70.4% Reference code: 04-005-0037, Tin Sn – 9.1% Reference code: 04-004-7745, Titanium Carbide  $\text{TiC}_{0.55}$  – 11.2% Reference code: 04-018-5143, Titanium Tin Carbide  $\text{Ti}_2\text{SnC}$  – 9.3% Reference code: 04-005-0049.

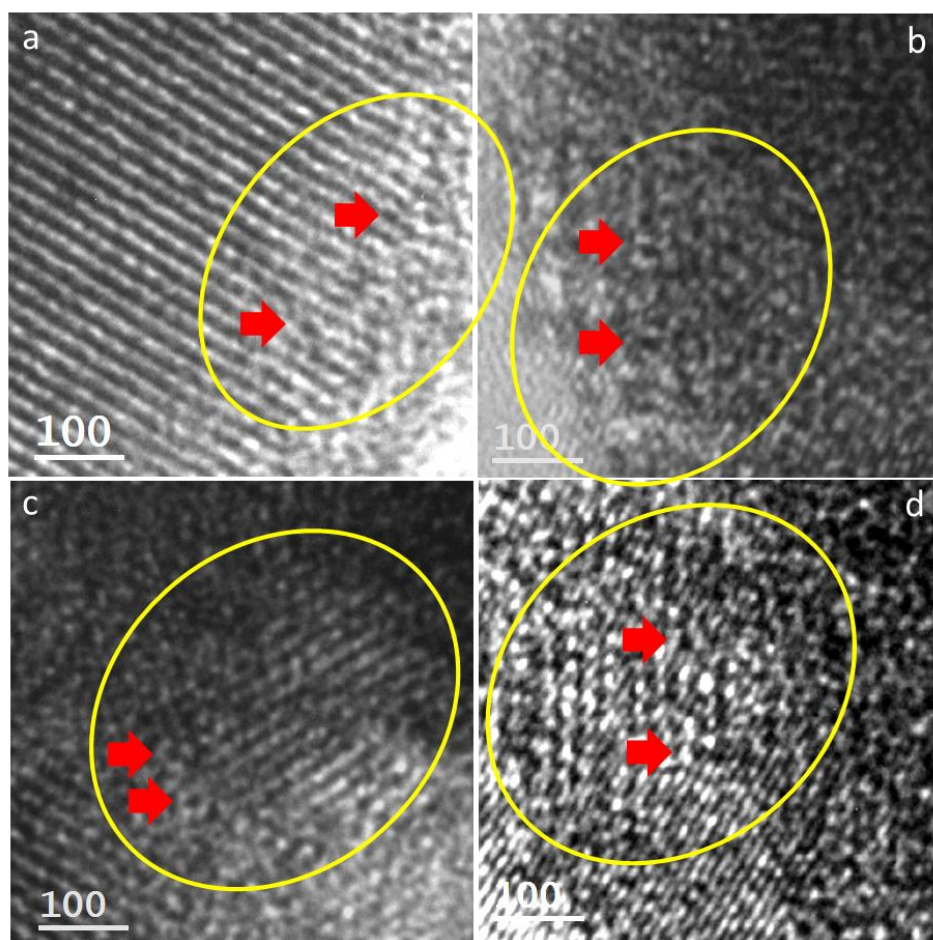

**Figure S5. (a–d)** HRTEM images of irradiation-induced defect cores in Ti<sub>2</sub>SnC-Ar<sup>+</sup>TNCF. The yellow marked regions indicated defect cores in a different region of interest, where the interaction of dislocation lines, voids, and atoms segregated on the surface (marked with red arrows) are well visible.

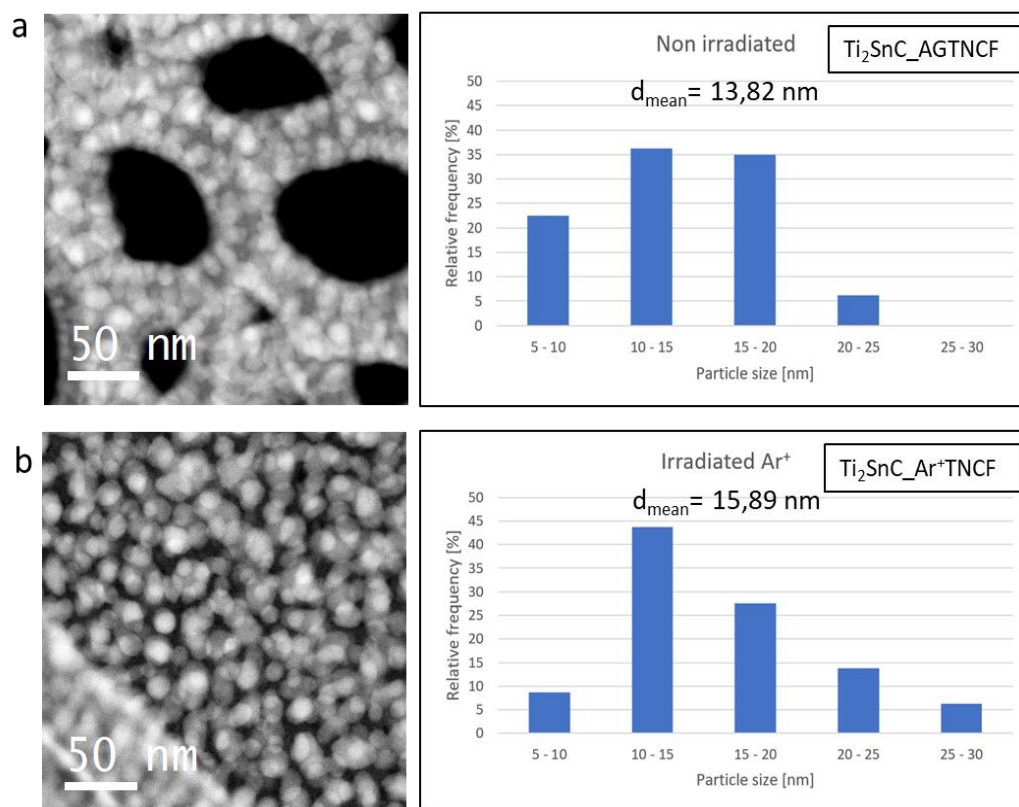

**Figure S6.** STEM images and corresponding particle size distribution estimated by ImageJ software [1]. (a) Ti<sub>2</sub>SnC\_AGTNCF and (b) Ti<sub>2</sub>SnC\_Ar<sup>+</sup>TNCF

## References

1. Rueden, C.T.; Schindelin, J.; Hiner, M.C.; DeZonia, B.E.; Walter, A.E.; Arena, E.T.; Eliceiri, K.W. ImageJ2: ImageJ for the next generation of scientific image data. *BMC Bioinformatics*, **2017**, *18*, 529–533. [https://doi: 10.1186/s12859-017-1934-z](https://doi.org/10.1186/s12859-017-1934-z).
